# Supplementary material for: New insights into the electrochemical performance of Li2MnSiO4: effect of cationic substitutions
Source: Royal Society of Chemistry journal article supplement (doi:10.1039/c4ta03367a), 2015-01-01
Supplement: c4ta03367a1.pdf [file c4ta03367a1.pdf]

## Supporting Information

**Table 1:** Structural details for Mn ions in the ground states  $\text{Li}_{2y}\text{MnSiO}_4$  ( $y = 0.75, 0.5, 0.25$  and  $0.125$ ): Oxidation state of and distances (in Å) to the neighbours up to 3 Å (see figure S1)

| <b>y = 0.75</b> | <b>y = 0.5</b> | <b>y = 0.25</b> | <b>y = 0.125</b> |
|-----------------|----------------|-----------------|------------------|
| <b>+2</b>       | <b>+3</b>      | <b>+3</b>       | <b>+4</b>        |
| O 2.0777        | O 1.8817       | O 1.8454        | O 1.8299         |
| O 2.0872        | O 1.9512       | O 1.9225        | O 1.8358         |
| O 2.1040        | O 1.9512       | O 1.9662        | O 1.8400         |
| O 2.1121        | O 2.0831       | O 1.9710        | O 1.9070         |
| O 3.0075        | O 2.9521       | O 2.2321        | O 2.3731         |
|                 | O 2.9521       |                 | O 2.9444         |
| <b>+3</b>       | <b>+3</b>      | <b>+4</b>       | <b>+4</b>        |
| O 1.8353        | O 1.9571       | O 1.8734        | O 1.8398         |
| O 1.9233        | O 1.9571       | O 1.8794        | O 1.8401         |
| O 1.9799        | O 2.0049       | O 1.9329        | O 1.8545         |
| O 1.9823        | O 2.0333       | O 1.9836        | O 1.8871         |
|                 | O 2.0824       | O 2.0980        | O 2.2862         |
|                 | Si 2.7225      | O 2.2383        | O 2.9624         |
| <b>+3</b>       | <b>+3</b>      | <b>+4</b>       | <b>+3</b>        |
| O 1.8353        | O 1.8741       | O 1.8269        | O 1.8350         |
| O 1.9233        | O 1.8871       | O 1.8995        | O 1.8621         |
| O 1.9799        | O 1.8871       | O 1.9275        | O 1.9104         |
| O 1.9823        | O 2.2310       | O 1.9872        | O 2.1653         |
|                 | Si 2.7178      | O 2.0175        | O 2.7864         |
|                 | O 2.9921       | O 2.0409        | Li 2.9705        |
|                 | O 2.9921       | Si 2.6279       |                  |
| <b>+2</b>       | <b>+3</b>      | <b>+3</b>       | <b>+4</b>        |
| O 2.0777        | O 1.8757       | O 1.8843        | O 1.8274         |
| O 2.0872        | O 1.9911       | O 1.9217        | O 1.8400         |
| O 2.1040        | O 1.9911       | O 1.9853        | O 1.8599         |
| O 2.1121        | O 2.0032       | O 2.1196        | O 1.9225         |
| O 3.0075        | O 2.0737       | O 2.1407        | O 2.0486         |
|                 | Si 2.6998      |                 | Si 2.6486        |
|                 | Li 2.8646      |                 | Li 2.7622        |
|                 | Li 2.8646      |                 | O 2.8672         |

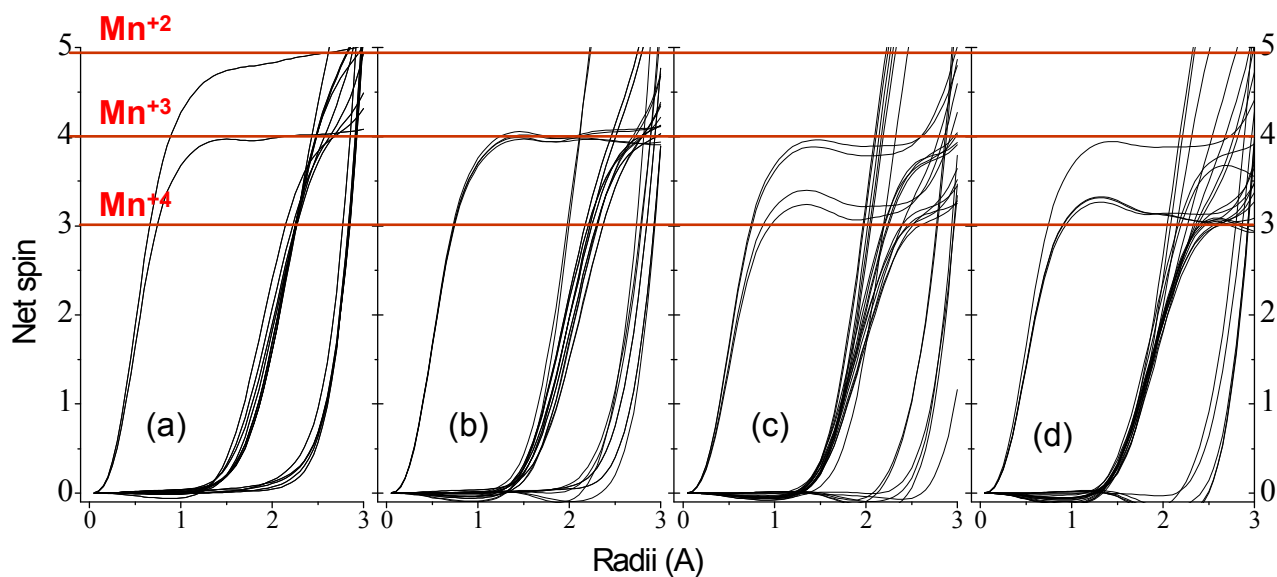

**Figure S1.-** Integrated net spin as a function of the radius around the ions in the ground states of  $\text{Li}_{2y}\text{MnSiO}_4$  with  $y = 0.75$  (a),  $0.5$  (b),  $0.25$  (c) and  $0.125$  (d)

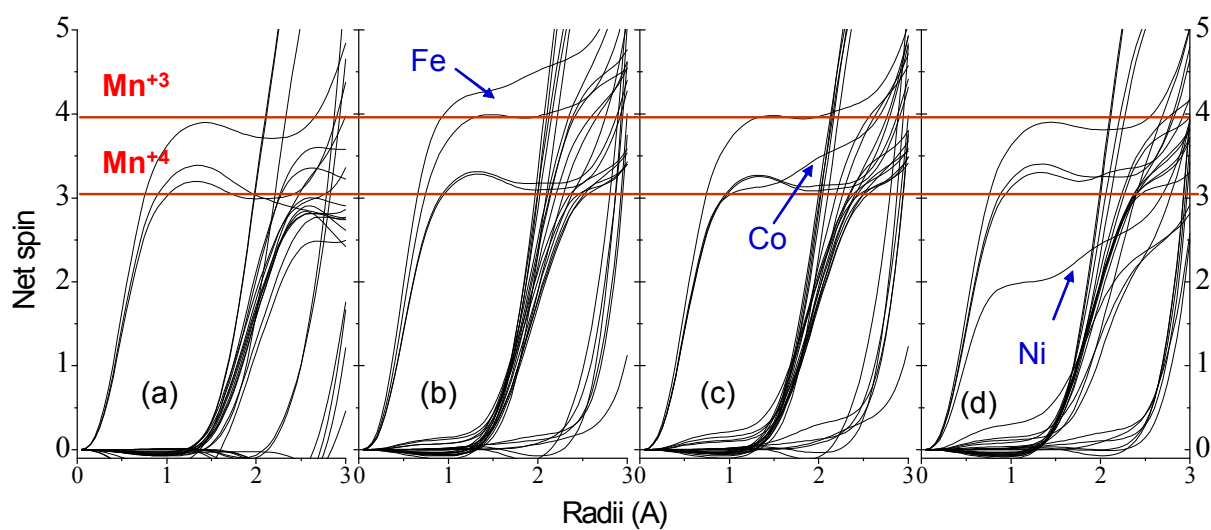

**Figure S2.-** Integrated net spin as a function of the radius around the ions in the ground states of  $\text{Li}_{0.5}\text{Mn}_{0.75}\text{M}_{0.25}\text{SiO}_4$  for  $M = \text{Mg}$  (a),  $\text{Fe}$  (b),  $\text{Co}$  (c) and  $\text{Ni}$  (d):

**Table 2:** Structural details for M ions in the ground states  $\text{Li}_{0.5}\text{Mn}_{0.75}\text{M}_{0.25}\text{SiO}_4$  (M = Mg, Fe, Co, Ni): Approximate oxidation state and distances (in Å) to the neighbours up to 3 Å (see figure S2)

| <b>Mg</b>    | <b>Fe</b>    | <b>Co</b>    | <b>Ni</b>    |
|--------------|--------------|--------------|--------------|
| <b>Mn +4</b> | <b>Mn +4</b> | <b>Mn+4</b>  | <b>Mn+4</b>  |
| O 1.8514     | O 1.8090     | O 1.8068     | O 1.8406     |
| O 1.9173     | O 1.8559     | O 1.8512     | O 1.8451     |
| O 1.9568     | O 1.9006     | O 1.8919     | O 1.9046     |
| O 1.9875     | O 1.9534     | O 1.9390     | O 1.9283     |
| O 2.2737     | O 1.9595     | O 1.9670     | O 1.9791     |
|              |              |              | Si 2.9598    |
| <b>Mn +4</b> | <b>Mn+4</b>  | <b>Mn +4</b> | <b>Mn+3</b>  |
| O 1.9001     | O 1.8236     | O 1.8163     | O 1.8751     |
| O 1.9484     | O 1.8947     | O 1.8946     | O 1.9196     |
| O 1.9552     | O 1.9137     | O 1.9117     | O 1.9803     |
| O 1.9639     | O 1.9961     | O 1.9858     | O 2.0269     |
| O 1.9701     | O 2.0404     | O 2.0369     | O 2.1014     |
| O 2.1906     | O 2.1248     | O 2.0987     |              |
| Si 2.6460    | Si 2.6398    | Si 2.6195    |              |
| Li 2.9980    |              |              |              |
| <b>Mn +4</b> | <b>Mn+3</b>  | <b>Mn+3</b>  | <b>Mn +4</b> |
| O 1.8374     | O 1.8937     | O 1.8889     | O 1.8371     |
| O 1.8961     | O 1.9620     | O 1.9398     | O 1.8513     |
| O 1.9058     | O 1.9732     | O 1.9578     | O 1.8732     |
| O 1.9976     | O 2.1086     | O 2.1351     | O 1.9747     |
| O 2.0103     | O 2.1492     | O 2.1701     | O 2.0640     |
| O 2.0271     |              |              |              |
| Si 2.5994    |              |              |              |
| <b>Mg+2</b>  | <b>Fe+3</b>  | <b>Co +3</b> | <b>Ni +2</b> |
| O 1.9505     | O 1.9060     | O 1.8809     | O 1.7953     |
| O 2.0360     | O 1.9089     | O 1.9096     | O 1.8926     |
| O 2.0386     | O 1.9376     | O 1.9167     | O 1.9596     |
| O 2.0518     | O 2.0205     | O 1.9870     | O 1.9597     |
| O 2.1680     | O 2.0997     | O 2.1352     | O 2.1440     |
|              | Li 2.9017    | Li 2.9089    | Li 2.8808    |
|              |              | Si 2.9706    |              |
|              |              | O 2.9921     |              |

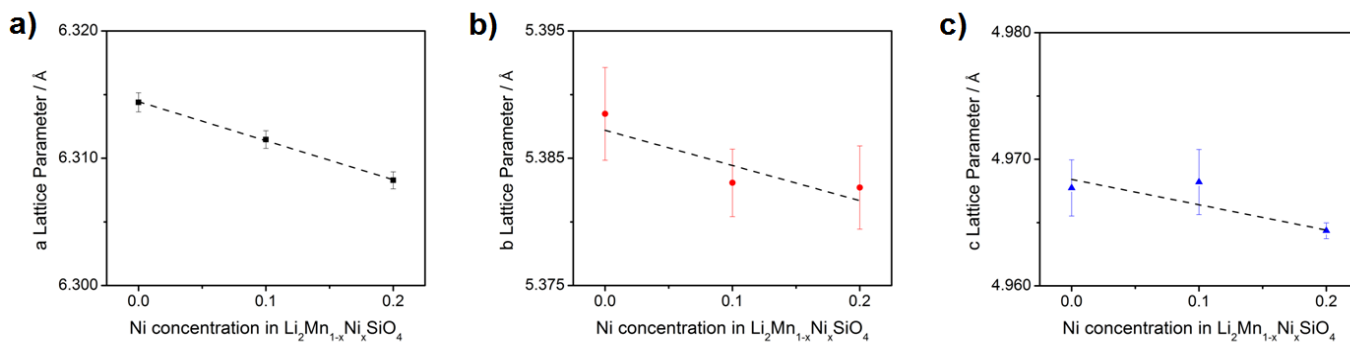

**Figure S3.** Lattice Parameter variation of Ni doped  $\text{Li}_2\text{Mn}_{1-x}\text{Ni}_x\text{SiO}_4$  showing decrease in all three parameters.

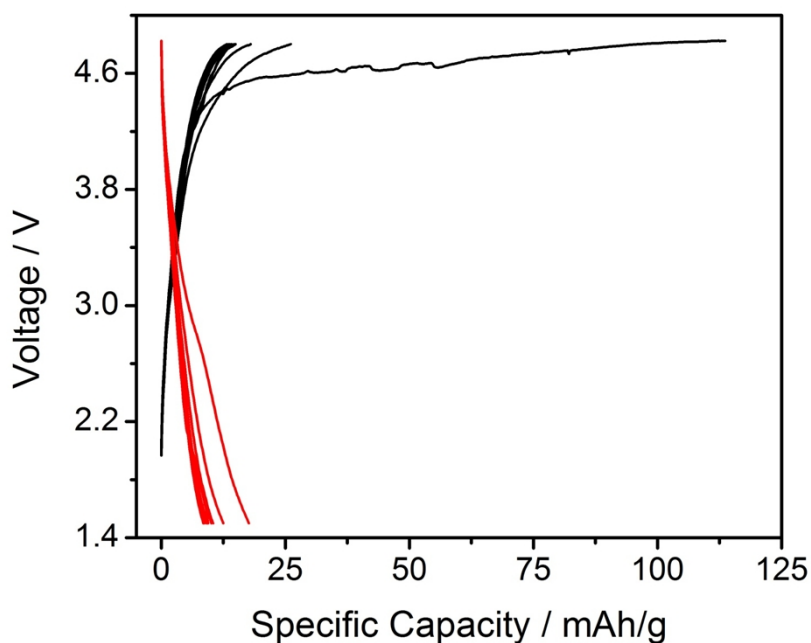

**Figure S4.** CV of as prepared  $\text{Li}_2\text{MnSiO}_4$  window of V was used at rate.

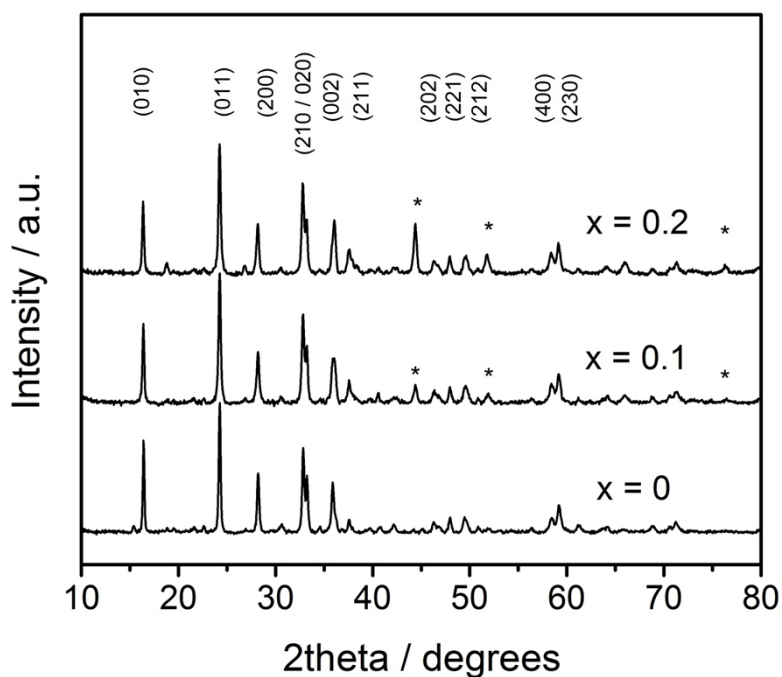

Cycling  
Voltage  
4.8 – 1.5  
a C/20

**Figure S5.** Powder X-ray diffraction patterns of  $\text{Li}_2\text{Mn}_{1-x}\text{Ni}_x\text{SiO}_4$  samples after the carbon coating process. Asterisk denotes Bragg maxima assignable to metallic Ni.

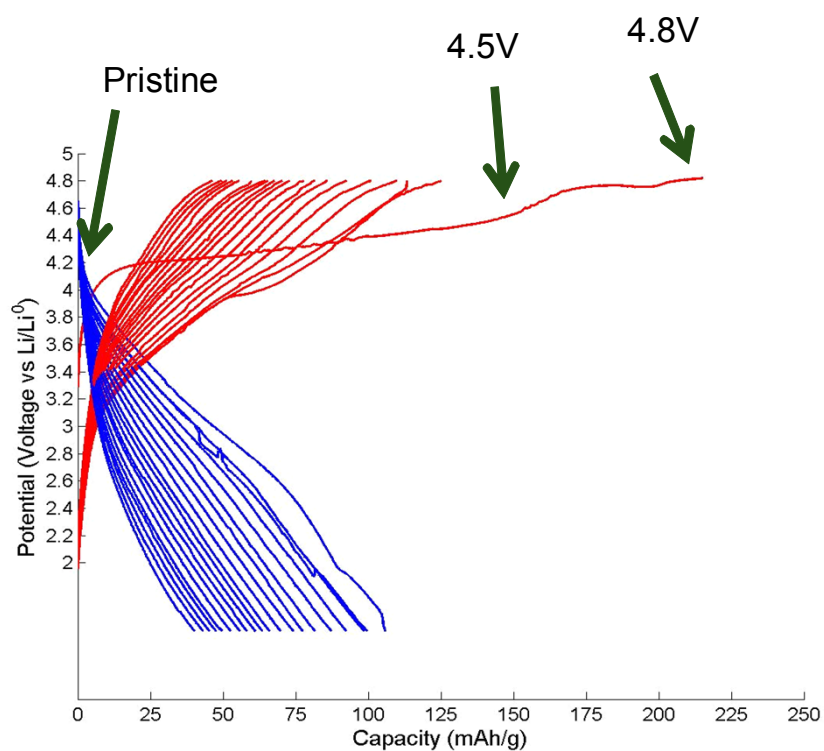

**Figure S6.** Cycling of a carbon coated  $\text{Li}_2\text{Mn}_{1-x}\text{Ni}_x\text{SiO}_4$  // Li cell. *Ex situ* XPS were collected at points A, B and C during the first charge.
